# Supplementary material for: The fractured landscape of RNA-seq alignment: the default in our STARs
Source: PubMed Central journal article supplement — Nucleic Acids Res. 2018 May 1;46(10):5125–38. doi: 10.1093/nar/gky325 (PMC6007662; doi:10.1093/nar/gky325), 2018-05-01
Supplement: gky325_supp.pdf [file gky325_supp.pdf]

## Supplementary material

### The fractured landscape of RNA-seq alignment: The default in our STARs

Sara Ballouz, Alexander Dobin, Thomas Gingeras, Jesse Gillis\*

\*Corresponding author

#### Table of Contents

|                                                               |    |
|---------------------------------------------------------------|----|
| Supplementary Tables .....                                    | 2  |
| Supplementary Text .....                                      | 4  |
| Additional materials and methods.....                         | 4  |
| Network analysis as an assessment metric .....                | 4  |
| ENCODE dataset reproduces the parameter choice paradigm ..... | 4  |
| Supplementary Figures .....                                   | 5  |
| Additional References .....                                   | 16 |

#### Table of Supplementary tables

|                                                             |   |
|-------------------------------------------------------------|---|
| Table S1 Studies used in the benchmark meta-assessment..... | 2 |
| Table S2 Studies used in the database meta-assessment ..... | 3 |

#### Table of Supplementary figures

|                                                                                                                         |    |
|-------------------------------------------------------------------------------------------------------------------------|----|
| Figure S1. Meta-assessment across the three gene expression databases: Gemma, ARCHS <sup>4</sup> and recount2. ....     | 5  |
| Figure S3. Quantification and X-Y gene misalignment. ....                                                               | 6  |
| Figure S4. Distinguishing between alignment errors and quantification errors. ....                                      | 7  |
| Figure S5. X-Y alignment assessment across three gene expression databases: Gemma, ARCHS <sup>4</sup> and recount2..... | 8  |
| Figure S6. Co-expression scores across three gene expression databases: Gemma, ARCHS <sup>4</sup> and recount2. ....    | 9  |
| Figure S2. Gene detection differences and expression levels.....                                                        | 10 |
| Figure S7. Other mapping statistics and metrics .....                                                                   | 11 |
| Figure S8. The effects of varying parameters on gene detection .....                                                    | 12 |
| Figure S9. The effects of varying parameters on co-expression scores .....                                              | 13 |
| Figure S10. Varying the parameter space of STAR in an ENCODE dataset. ....                                              | 14 |
| Figure S11. Parameter impact on downstream biological interpretation. ....                                              | 15 |

## Supplementary Tables

Table S1 Studies used in the benchmark meta-assessment

| <b>Study</b>                             | <b>Number of datasets/<br/>samples</b> | <b>Number of methods</b> | <b>Notes</b>                                                                          |
|------------------------------------------|----------------------------------------|--------------------------|---------------------------------------------------------------------------------------|
| <b>Fraction mapped assessment metric</b> |                                        |                          | Fraction of unique reads mapped out of total reads                                    |
| Bao et al. 2011 (1)                      | 4                                      | 11                       |                                                                                       |
| Baruzzo et al. 2016 (2)                  | 37                                     | 16                       |                                                                                       |
| Bonfert et al. 2015 (3)                  | 2                                      | 7                        |                                                                                       |
| Dillies et al. 2012 (4)                  | 23                                     | 3                        |                                                                                       |
| Dobin et al. 2012 (5)                    | 1                                      | 5                        |                                                                                       |
| Engstrom et al. 2013 (6)                 | 4                                      | 13                       |                                                                                       |
| Gran et al. 2011 (7)                     | 2                                      | 11                       |                                                                                       |
| Langmead et al. 2012 (8)                 | 7                                      | 9                        |                                                                                       |
| Li et al. 2009 (9)                       | 3                                      | 4                        |                                                                                       |
| <b>Correlation assessment metric</b>     |                                        |                          | Correlations to qPCR                                                                  |
| Bray et al. 2016 (10)                    | 4                                      | 8                        |                                                                                       |
| Chandramohan et al. 2013 (11)            | 1                                      | 4                        |                                                                                       |
| Li et al. 2011 (12)                      | 9                                      | 4                        |                                                                                       |
| <b>Both</b>                              |                                        |                          | Correlations between “known truth” (published or simulated ) and estimated abundances |
| Benjamin et al. 2012 (13)                | 1                                      | 4                        |                                                                                       |
| Li et al. 2015 (14)                      | 56                                     | 3                        |                                                                                       |

Table S2 Studies used in the database meta-assessment

| SRA project ID | GEO series ID | Female samples | Male samples | Unspecified | Total samples |
|----------------|---------------|----------------|--------------|-------------|---------------|
| SRP033135      | GSE52529      |                |              | 353         | 353           |
| SRP027383      | GSE48865      |                |              | 274         | 274           |
| SRP051848      | GSE64813      |                |              | 188         | 188           |
| SRP042620      | GSE58135      |                |              | 168         | 168           |
| SRP041538      | GSE57148      |                |              | 166         | 166           |
| SRP011546      | GSE36552      |                |              | 124         | 124           |
| SRP044668      | GSE59612      |                |              | 92          | 92            |
| SRP056733      | GSE67427      |                |              | 89          | 89            |
| SRP042161      | GSE57872      |                |              | 84          | 84            |
| SRP033393      | GSE52834      |                |              | 73          | 73            |
| SRP050272      | GSE63646      |                |              | 71          | 71            |
| SRP028301      | GSE49321      |                | 7            | 56          | 63            |
| SRP051688      | GSE64655      |                |              | 56          | 56            |
| SRP029880      | GSE50760      |                |              | 54          | 54            |
| SRP045352      | GSE60216      |                |              | 54          | 54            |
| SRP041751      | GSE57395      |                |              | 53          | 53            |
| SRP043162      | GSE58434      |                |              | 53          | 53            |
| SRP055390      | GSE66117      |                |              | 52          | 52            |
| SRP041179      | GSE56796      |                |              | 42          | 42            |
| SRP021193      | GSE46224      |                |              | 40          | 40            |
| SRP030041      | GSE50893      |                |              | 36          | 36            |
| SRP042286      | GSE57982      |                |              | 31          | 31            |
| SRP016568      | GSE41716      |                |              | 29          | 29            |
| SRP018525      | GSE44183      |                |              | 29          | 29            |
| SRP049068      | GSE62526      |                |              | 29          | 29            |
| SRP042153      | GSE57866      |                |              | 28          | 28            |
| SRP041620      | GSE57253      |                |              | 26          | 26            |
| SRP022133      | GSE46665      |                |              | 25          | 25            |
| SRP041675      | GSE57299      |                |              | 25          | 25            |
| SRP051765      | GSE64741      | 17             |              | 24          | 41            |
| SRP033466      | GSE52934      |                |              | 24          | 24            |
| SRP033569      | GSE53094      |                |              | 24          | 24            |
| SRP043080      | GSE58335      |                |              | 24          | 24            |
| SRP046226      | GSE61141      |                |              | 24          | 24            |
| SRP047233      | GSE61491      |                |              | 22          | 22            |
| SRP043085      | GSE58375      |                |              | 21          | 21            |
| SRP032789      | GSE52194      |                |              | 20          | 20            |
| SRP041159      | GSE56785      |                |              | 20          | 20            |
| SRP027258      | GSE48812      |                | 24           | 12          | 36            |
| SRP050036      | GSE63452      | 13             |              | 12          | 25            |
| SRP041162      | GSE56788      |                | 40           |             | 40            |
| SRP051083      | GSE64098      | 40             |              |             | 40            |
| SRP040418      | GSE56066      | 30             |              |             | 30            |
| SRP042616      | GSE58111      | 24             |              |             | 24            |
| SRP045421      | GSE60296      | 16             |              | 8           | 24            |
| *SRP029262     | GSE50244      | 35             | 54           |             | 89            |
| *SRP043108     | GSE58387      | 12             | 9            |             | 21            |
| *SRP044917     | GSE59810      | 9              | 9            | 9           | 27            |
| *SRP043368     | GSE58608      | 12             | 12           |             | 24            |
| *SRP028336     | GSE49379      | 15             | 15           |             | 30            |
| *SRP045666     | GSE60590      | 16             | 17           |             | 33            |
| *SRP043221     | GSE56787      | 19             | 19           |             | 38            |
| *SRP035599     | GSE54308      | 19             | 21           |             | 40            |
| *SRP049593     | GSE63055      | 30             | 27           |             | 57            |
| *SRP047476     | GSE61742      | 41             | 31           |             | 72            |
| *SRP033566     | GSE53080      | 9              | 35           |             | 44            |
| *SRP026042     | GSE47944      | 44             | 40           |             | 84            |

\* Experiments used in the X-Y alignment assessment

## Supplementary Text

### Additional materials and methods

We ran STAR version 2.4.2a on an ENCODE dataset which consists of 17 samples from different cell lines. We used genome version GRCh38.p2 and GENCODE version 22 (15). The parameters changed were the minimum alignment score (minAS, parameter: `--outFilterScoreMinOverLread`), number of mismatches (numMM, `--outFilterMismatchNmax`), length of reads (lenR, `--clip3pNbases`), and read downsampling. The minimum alignment score was varied to range between 0.55 and 0.99. The number of mismatches allowed was varied to range between 0 and 10. Length of reads (trimming reads from the 3' end) was varied to range between 20 and 76. We downsampled reads with a local script by sampling across the mapped reads at random (95% to 50% by increments of 5%). RSEM version 1.2.28 was run to quantify the expression levels of the ENCODE dataset. We considered both FPKM and TPM.

To perform a network enrichment analysis, we first generate co-expression networks using all samples at each alignment parameter. Briefly, we calculate a weight between gene pairs by using the Spearman correlation coefficient which is then rank standardized. To then measure the information content of the network, we use the performance of the  $n$ -fold cross validation task of a neighbor voting algorithm. If we can hide known information about genes in a gene set and then “learn” this information from the network, then our network has, to a degree, information that is reflective of the known biology of that GO term. This is based on the “guilt-by-association” principle, which states that genes with shared functions should be connected preferentially in the network. The reported performance metric from this task is the averaged AUROC (area under the ROC curve) for each group across the  $n$ -folds. We used the Bioconductor package EGAD (16) and GO (17) to perform this analysis on the individual co-expression networks.

### ENCODE dataset reproduces the parameter choice paradigm

We repeated all the same analyses on a second, dataset with fewer samples but greater depth, across a larger number of parameters within STAR, summarized in **Figure S10**. We first characterize the effects of the choice of parameter on the read depth and gene coverage. Even though read depth ranged between ~38M and 73M reads, gene coverage only changed between 14.5K and 15.5K (**Figure S10A**), with some parameters changing only a few hundred genes at most. We then calculate the replicability scores for each of the parameters. Under default parameters, most samples have good replicability scores (below 0, **Figure S10B**). As in the GEUVADIS dataset, we find very little effects on the replicability score (**Figure S10D**) across all the parameters. Although not significant, for most of the parameters the more stringent parameter (grey distribution in the violin plots), has better average scores and heavier negative tails.

### Network analysis as an assessment metric

As the co-expression between gene pairs can be used to generate weighted gene-gene networks, we can perform a network analysis task that measures the amount of information in a network using a “guilt-by-

association” predictor of Gene Ontology (GO) annotations. As expected from the previous results, the average performance across all GO groups is very similar across the different parameter choices (average AUROC~0.61), and correlations across the individual GO groups near 0.88 (**Figure S11A-B**). The node degrees of the networks generated are also highly correlated (**Figure S11C-D**). Additionally, one could look at the change in co-expression of a gene to all other genes (e.g., *XIST* **Figure S11E**). For the approximately 30K transcripts, co-expression pairs remain highly correlated compared to the default minAS (average  $r_s=0.90$ , **Figure S11F**). Protein-coding genes were also more correlated (average  $r_s=0.94$ ). The lowest correlations were again to the most conservative minAS, with scores per gene (minAS 0.66 vs 0.99, average  $r_s=0.78$ ).

## Supplementary Figures

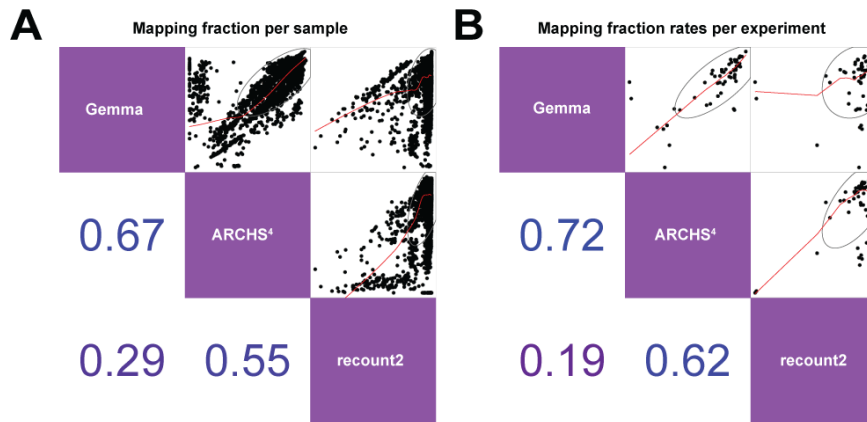

**Figure S1. Meta-assessment across the three gene expression databases: Gemma, ARCHS<sup>4</sup> and recount2.**

(A) Comparing fraction mapping rates per samples (B) and then averaged per experiment. There are some experiments that are outliers. Input reads differed mainly due to PE/SE counting and QC filtering that was not described which may have affected mapping rate calculations for some samples.

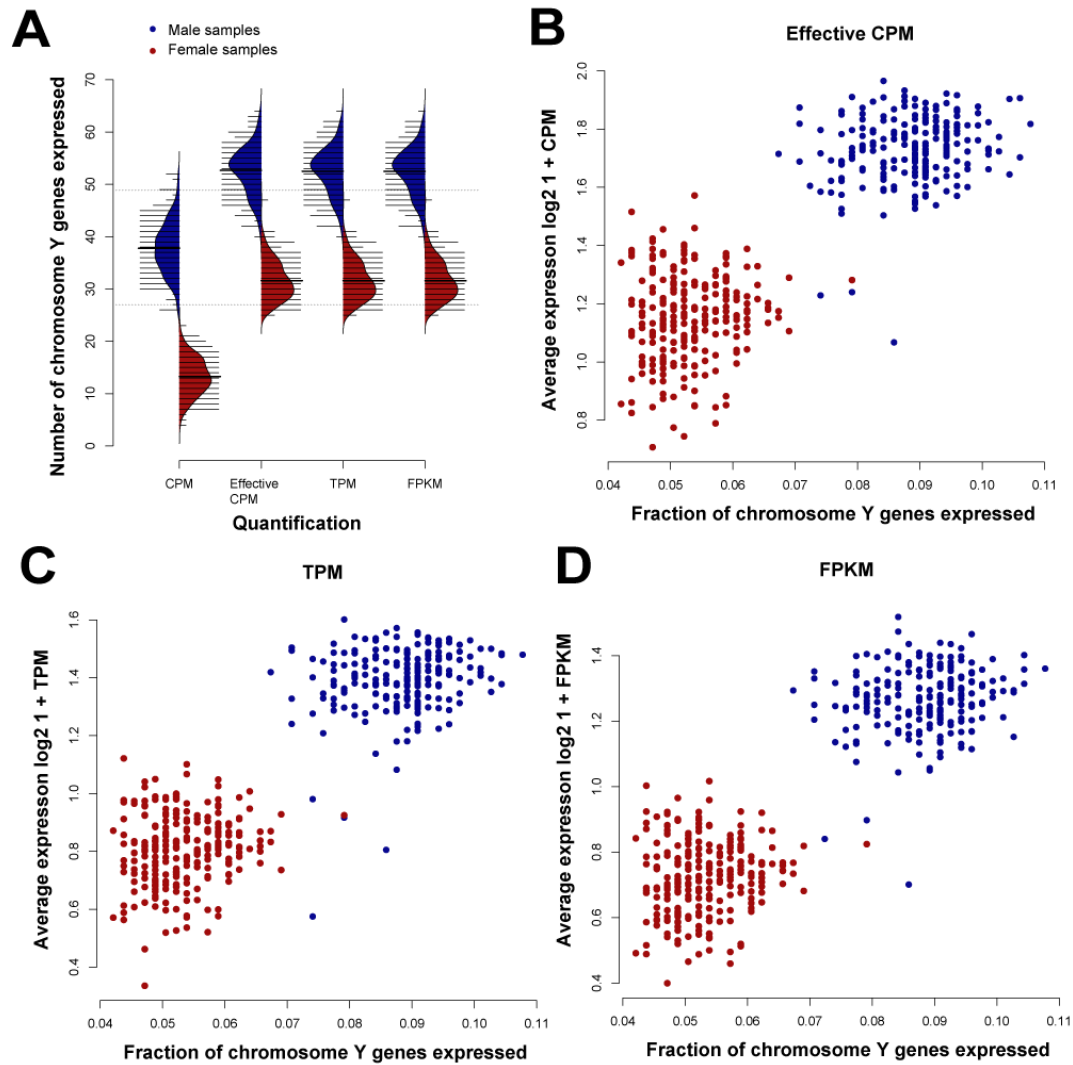

**Figure S2. Quantification and X-Y gene misalignment.**

(A) Quantification exacerbates the problem with Y gene expression in female samples. Here we used RSEM under default parameters. (B) Comparing fraction of Y genes expressed compared to the effective counts as reported by RSEM (C) for TPM (D) and FPKM.

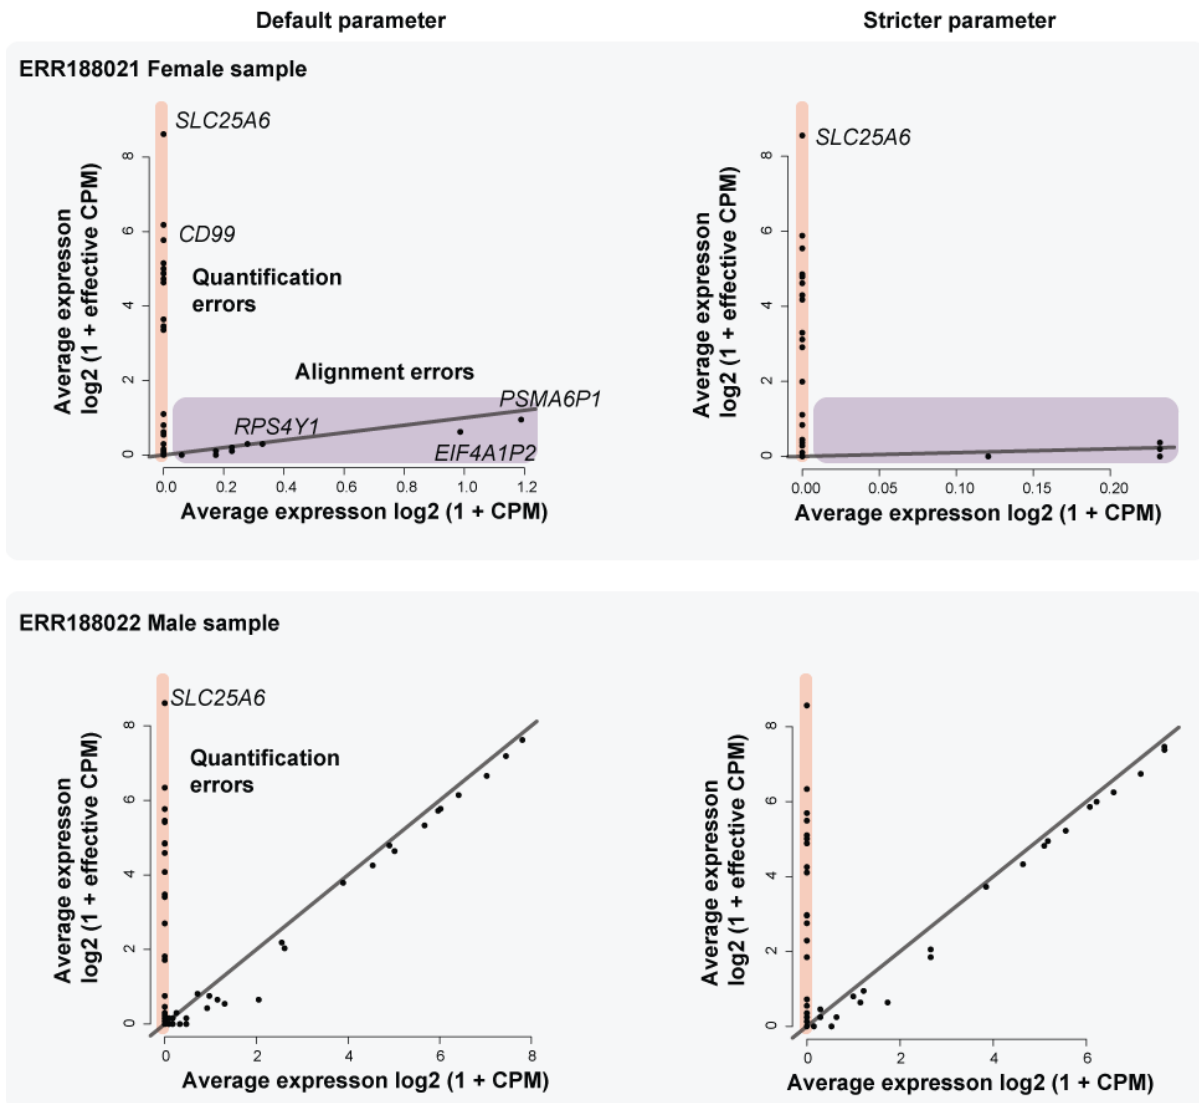

**Figure S3. Distinguishing between alignment errors and quantification errors.**

Comparing alignment CPM to Effective CPM distinguishes alignment errors from quantification based errors. Here we've shown a representative female and male sample at default parameters and a stricter parameter ( $\text{minAS}=0.99$ ). There are genes that are not expressed (counts based) but appear as expressed once quantified (effective counts), labelled as quantification errors. Errors of alignment, on the other hand, appear as both counts and effective counts, and can be distinguished in the female samples here.

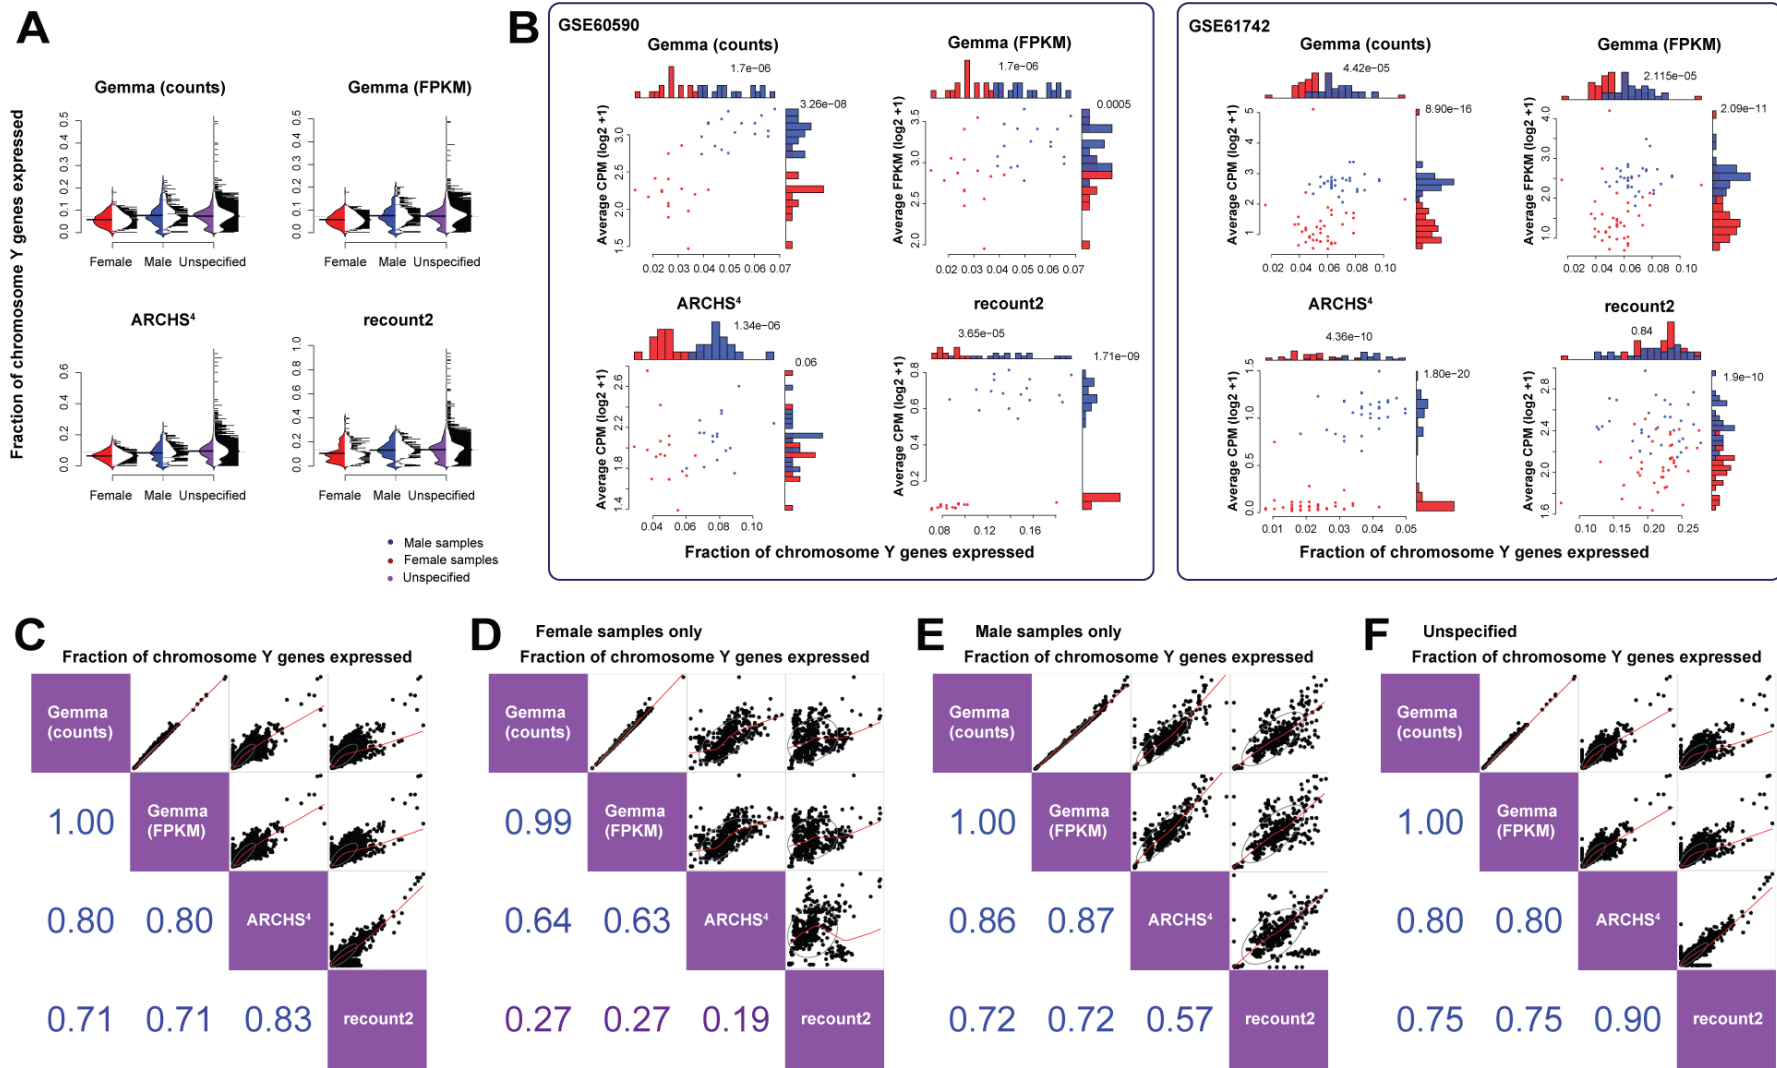

**Figure S4. X-Y alignment assessment across three gene expression databases: Gemma, ARCHS<sup>4</sup> and recount2.**

(A) Violinplots of the fraction of Y genes mapped by each of the four pipelines (in the three databases). These comparisons are once again between 3,405 samples in 57 experiments. Recount2 had a few samples missing from the analysis. (B) Two example experiments GSE60590 and GSE61742. (C) Comparison of the fraction mapped to Y genes for all samples (D) those labelled as female, (E) those labeled as male and (F) those unspecified.



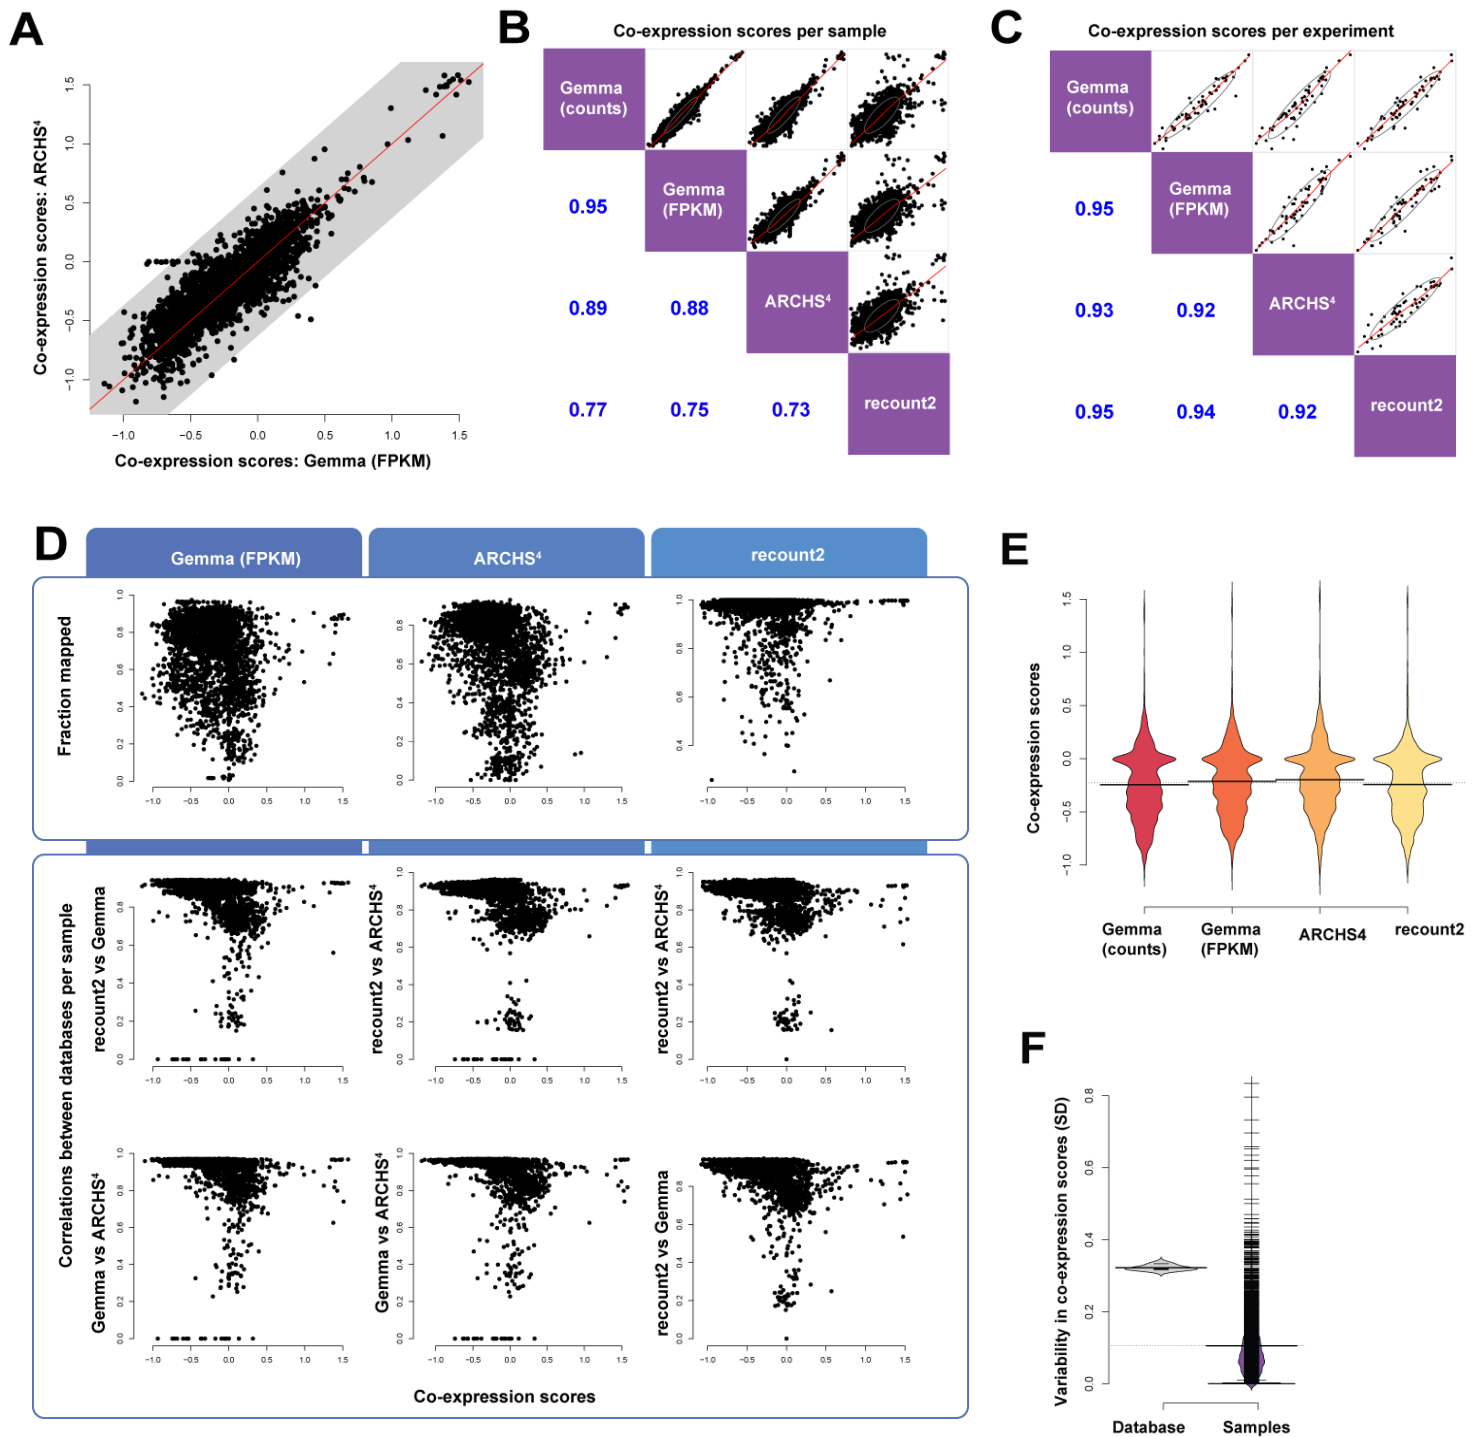

**Figure S5. Co-expression scores across three gene expression databases: Gemma, ARCHS<sup>4</sup> and recount2.**

(A) Comparison between Gemma and ARCHS<sup>4</sup> data (light grey is 1 SD=0.3 from the identity line,  $r_s=0.88$ ). (B) Correlations of co-expression scores for the four pipelines (in the three databases). These comparisons are between 3,405 samples. Recount2 had a few samples missing from the analysis. (C) Correlations of the scores once summarized (averaged) per experiment (57 experiments listed in Table S2). (D) Comparisons to fraction mapped metrics and correlations between databases (per sample). (E) Distribution of scores by database (F) and the variability of samples by database and samples across databases.

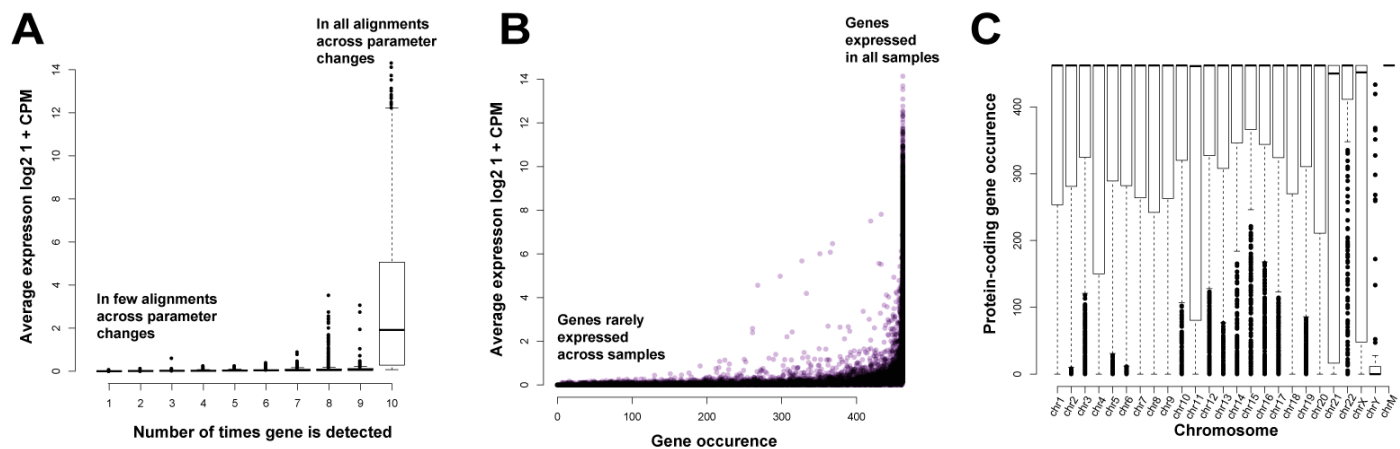

**Figure S6. Gene detection differences and expression levels.**

(A) Dropouts between parameters versus average expression, in an example sample (ERR188479). Most differences across parameters are from low expressing genes, with a few exceptions. (B) Occurrence vs expression for all samples at the default parameter ( $\text{minAS}=0.66$ ). Most samples express most genes. (C) Occurrence across samples per chromosome for default parameter ( $\text{minAS}=0.66$ ). Majority of dropouts between samples (bottom of boxplots) are the Y chromosome genes (medians are the lowest).

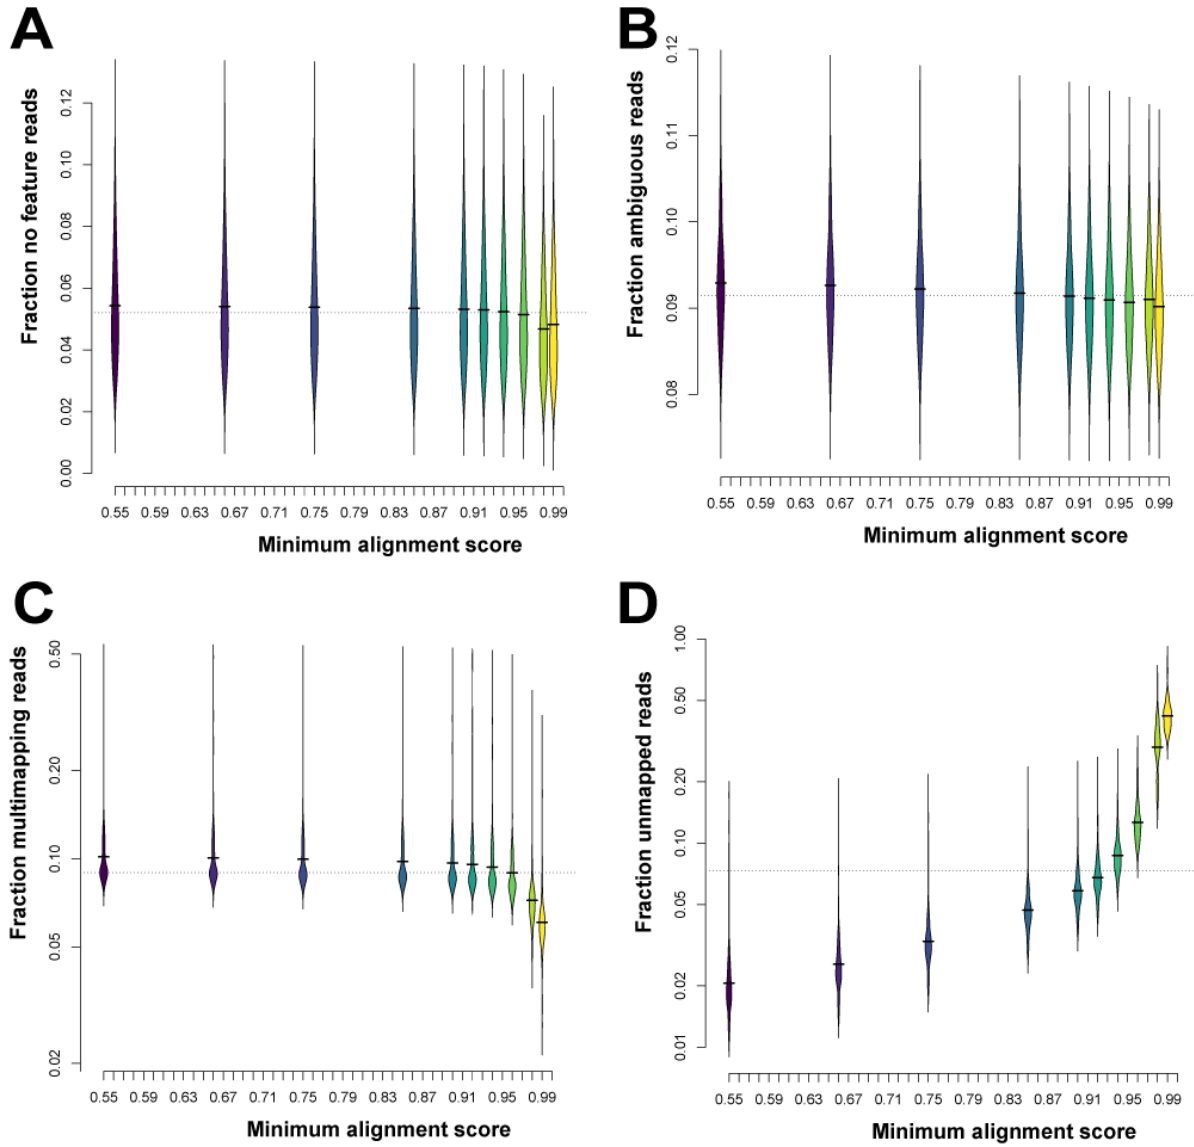

**Figure S7. Other mapping statistics and metrics**

(A) Fraction of uniquely mapped reads with no features. (B) Fraction of ambiguous mapped reads (cross feature boundaries). (C) Fraction of multimappers in total. (D) Fraction of unmapped reads.

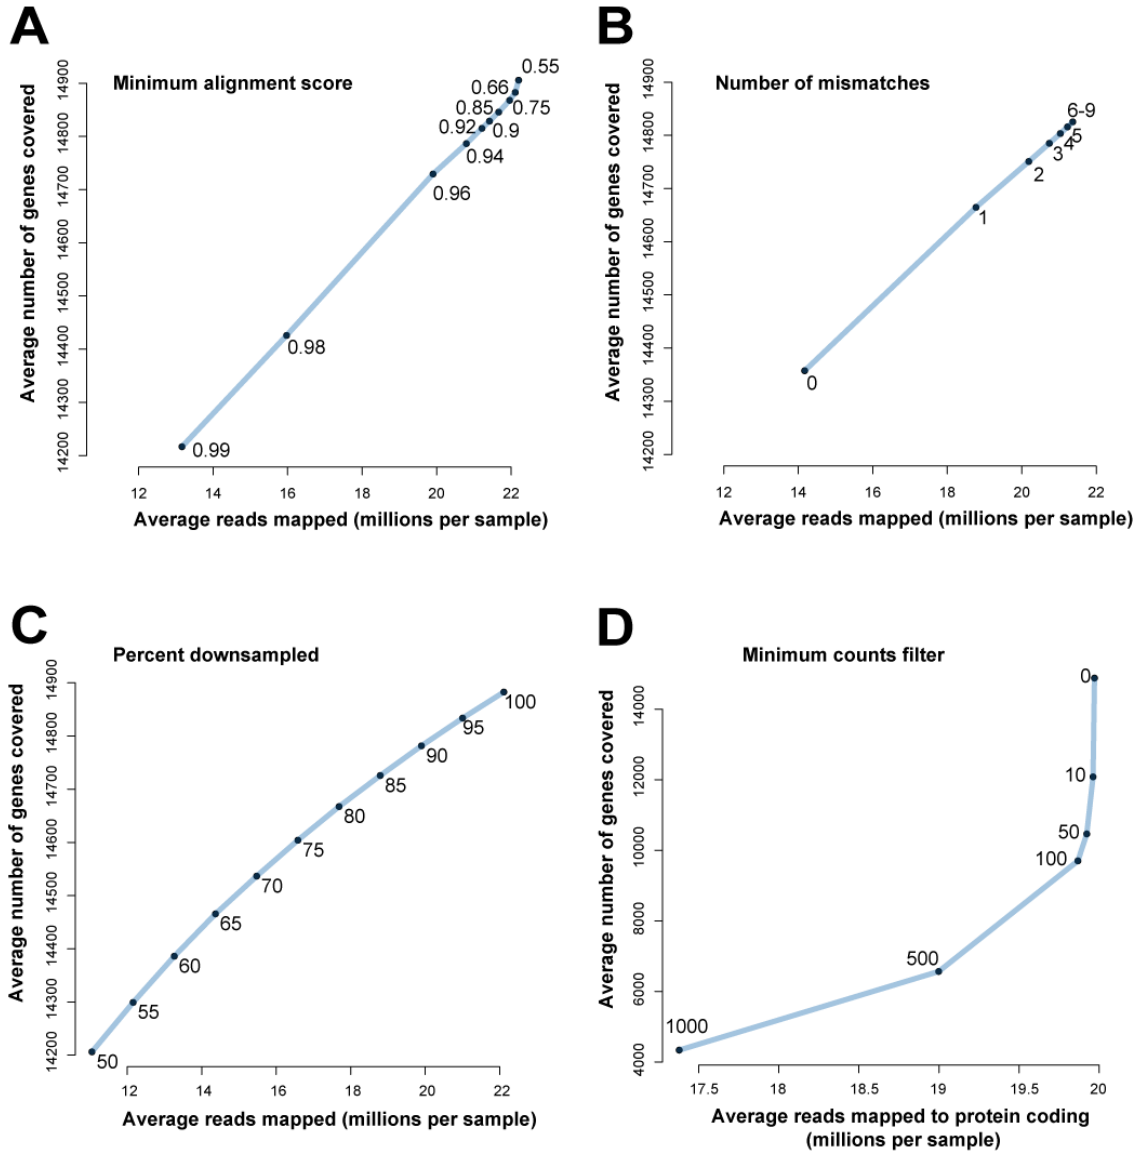

**Figure S8. The effects of varying parameters on gene detection**

Effects of gene detection on the GEUVADIS dataset when (A) varying minimum alignment scores, (B) number of mismatches, (C) downsampling and (D) filtering low expressing genes

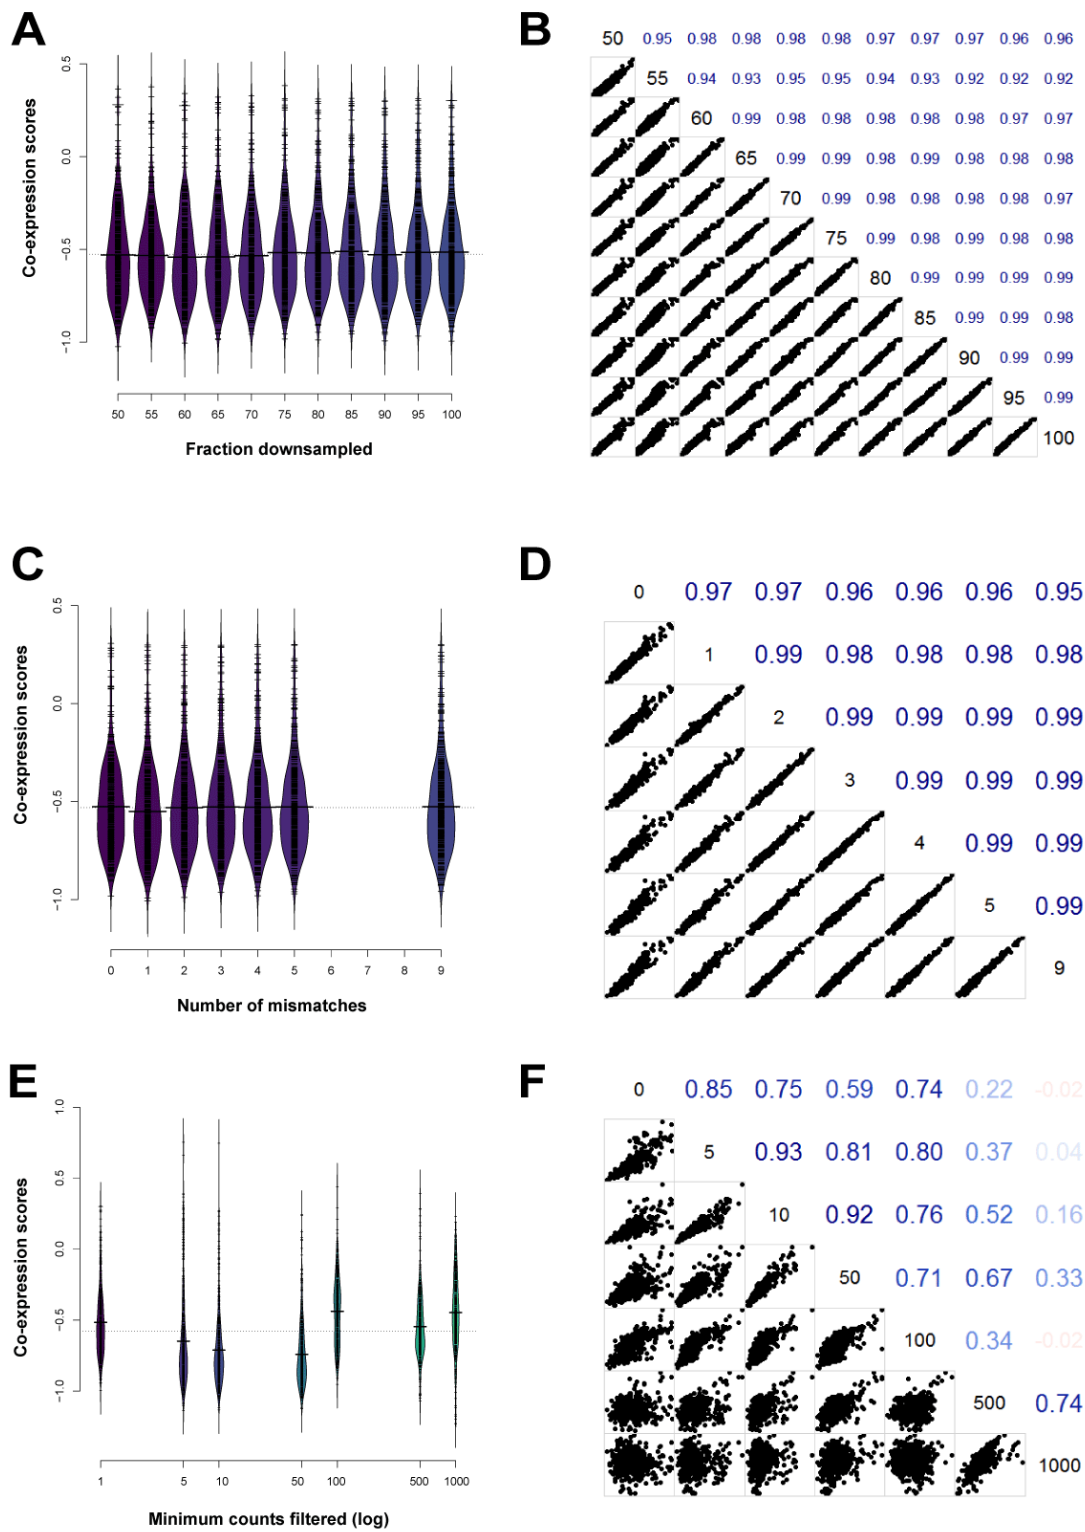

**Figure S9. The effects of varying parameters on co-expression scores**

(A) and (B) downsampling. (C) and (D) number of mismatches allowed. (E) and (F) counts filter.

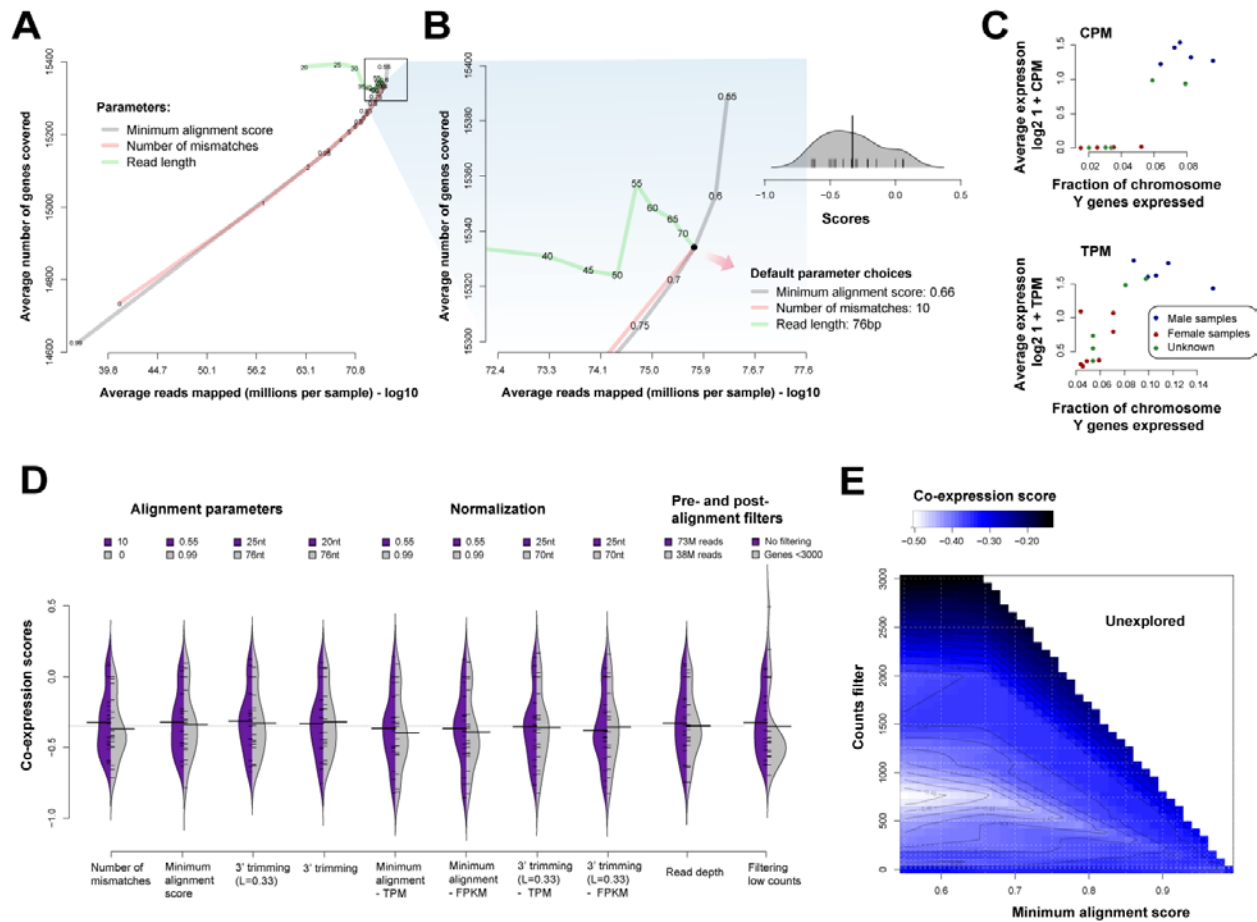

**Figure S10. Varying the parameter space of STAR in an ENCODE dataset.**

(A) Mapping statistics and coverage across the parameter space of STAR for the ENCODE dataset (B) Default parameter mapping statistics and inset showing the replicability scores. (C) XY misalignment is still a problem (CPM, top), that is increased with quantification (TPM, bottom). (D) Distributions of scores for the extreme parameters tested on an ENCODE dataset of 17 samples. The purple distribution shows the scores per sample of the most permissive parameter and the grey distribution the most stringent. As in the GEUVADIS dataset, the distributions are consistent showing little change, with the filtering of low counts showing the most change in distribution (last violin plot). (E) Interpolated co-expression scores showing alignment and post-alignment filter hotspots (light blue to white). Dark areas are least replicable. These results are averaged over all 17 samples for 1000 runs, and interpolated between the dashed lines. Contours define interpolated score boundaries. The unexplored regions could not be interpolated from tested data.



## Additional References

1. Bao, S., Jiang, R., Kwan, W., Wang, B., Ma, X. and Song, Y.-Q. (2011) Evaluation of next-generation sequencing software in mapping and assembly. *J Hum Genet*, **56**, 406-414.
2. Baruzzo, G., Hayer, K.E., Kim, E.J., Di Camillo, B., FitzGerald, G.A. and Grant, G.R. (2017) Simulation-based comprehensive benchmarking of RNA-seq aligners. *Nat Meth*, **14**, 135-139.
3. Bonfert, T., Kirner, E., Csaba, G., Zimmer, R. and Friedel, C.C. (2015) ContextMap 2: fast and accurate context-based RNA-seq mapping. *BMC Bioinformatics*, **16**, 122.
4. Dillies, M.-A., Rau, A., Aubert, J., Hennequet-Antier, C., Jeanmougin, M., Servant, N., Keime, C., Marot, G., Castel, D., Estelle, J. *et al.* (2013) A comprehensive evaluation of normalization methods for Illumina high-throughput RNA sequencing data analysis. *Briefings in Bioinformatics*, **14**, 671-683.
5. Dobin, A., Davis, C.A., Schlesinger, F., Drenkow, J., Zaleski, C., Jha, S., Batut, P., Chaisson, M. and Gingeras, T.R. (2012) STAR: ultrafast universal RNA-seq aligner. *Bioinformatics*.
6. Engstrom, P.G., Steijger, T., Sipos, B., Grant, G.R., Kahles, A., The, R.C., Ratsch, G., Goldman, N., Hubbard, T.J., Harrow, J. *et al.* (2013) Systematic evaluation of spliced alignment programs for RNA-seq data. *Nat Meth*, **10**, 1185-1191.
7. Grant, G.R., Farkas, M.H., Pizarro, A.D., Lahens, N.F., Schug, J., Brunk, B.P., Stoeckert, C.J., Hogenesch, J.B. and Pierce, E.A. (2011) Comparative analysis of RNA-Seq alignment algorithms and the RNA-Seq unified mapper (RUM). *Bioinformatics*, **27**, 2518-2528.
8. Langmead, B. and Salzberg, S.L. (2012) Fast gapped-read alignment with Bowtie 2. *Nat Meth*, **9**, 357-359.
9. Li, H. and Durbin, R. (2009) Fast and accurate short read alignment with Burrows–Wheeler transform. *Bioinformatics*, **25**, 1754-1760.
10. Bray, N., Pimentel, H., Melsted, P. and Pachter, L. (2016) Near-optimal probabilistic RNA-seq quantification. *Nature biotechnology*, **34**, 525.
11. Chandramohan, R., Wu, P.-Y., Phan, J.H. and Wang, M.D. (2013) Benchmarking RNA-Seq quantification tools. *Conference proceedings : ... Annual International Conference of the IEEE Engineering in Medicine and Biology Society. IEEE Engineering in Medicine and Biology Society. Annual Conference*, **2013**, 647-650.
12. Li, B. and Dewey, C.N. (2011) RSEM: accurate transcript quantification from RNA-Seq data with or without a reference genome. *BMC bioinformatics*, **12**, 323.
13. Benjamin, A.M., Nichols, M., Burke, T.W., Ginsburg, G.S. and Lucas, J.E. (2014) Comparing reference-based RNA-Seq mapping methods for non-human primate data. *BMC Genomics*, **15**, 570.
14. Li, P., Piao, Y., Shon, H.S. and Ryu, K.H. (2015) Comparing the normalization methods for the differential analysis of Illumina high-throughput RNA-Seq data. *BMC Bioinformatics*, **16**, 347.
15. Harrow, J., Frankish, A., Gonzalez, J.M., Tapanari, E., Diekhans, M., Kokocinski, F., Aken, B.L., Barrell, D., Zadissa, A., Searle, S. *et al.* (2012) GENCODE: the reference human genome annotation for The ENCODE Project. *Genome Res.*, **22**, 1760-1774.
16. Ballouz, S., Weber, M., Pavlidis, P. and Gillis, J. (2017) EGAD: ultra-fast functional analysis of gene networks. *Bioinformatics*, **33**, 612-614.
17. Ashburner, M., Ball, C.A., Blake, J.A., Botstein, D., Butler, H., Cherry, J.M., Davis, A.P., Dolinski, K., Dwight, S.S., Eppig, J.T. *et al.* (2000) Gene ontology: tool for the unification of biology. The Gene Ontology Consortium. *Nat. Genet.*, **25**, 25-29.
